# Supplementary material for: A novel CCR2 antagonist inhibits atherogenesis in apoE deficient mice by achieving high receptor occupancy
Source: PubMed Central journal article supplement (PMC5427923; doi:10.1038/s41598-017-00104-z), 2017-03-03
Supplement: 41598_2017_104_MOESM1_ESM.pdf [file 41598_2017_104_MOESM1_ESM.pdf]

# Supplementary Information

## **A novel CCR2 antagonist inhibits atherogenesis in apoE deficient mice by achieving high receptor occupancy**

Ilze Bot<sup>1,+</sup>, Natalia V. Ortiz Zacarías<sup>2,+</sup>, Wilhelmus E.A. de Witte<sup>3</sup>, Henk de Vries<sup>2</sup>, Peter J. van Santbrink<sup>1</sup>, Daniël van der Velden<sup>1</sup>, Mara J. Kröner<sup>1</sup>, Dirk-Jan van der Berg<sup>3</sup>, Dean Stamos<sup>4</sup>, Elizabeth C.M. de Lange<sup>3</sup>, Johan Kuiper<sup>1</sup>, Adriaan P. IJzerman<sup>2</sup>, Laura H. Heitman<sup>2,\*</sup>

<sup>1</sup>Division of Biopharmaceutics, <sup>2</sup>Division of Medicinal Chemistry and <sup>3</sup>Division of Pharmacology, Leiden Academic Centre for Drug Research (LACDR), Leiden University, Leiden, the Netherlands.

<sup>3</sup>Vertex Pharmaceuticals, San Diego, CA, USA.

\*l.h.heitman@lacdr.leidenuniv.nl

<sup>+</sup>these authors contributed equally to this work

| <b>Gene</b>    | <b>Forward primer (5'-3')</b> | <b>Reverse primer (3'-5')</b> |
|----------------|-------------------------------|-------------------------------|
| ALT            | CCCTGACATGTTCTTCTGTCTGTGCC    | CCTCAGTTTCTCCAGCAGCACCC       |
| AST            | TGACCGGATTCTGACCATGAGATCCG    | GGTCAAGCCGCACATGTTGATCCG      |
| apoH           | CATGAGACATACAAGCTGGACGGCC     | TACAGCACGGTGGCTTTCTTAACGG     |
| GC             | GCAGAACGGCTAAGGACAAAA         | AGTCCGAGTGTTCCTCCACCAT        |
| Rpl27          | CGCCAAGCGATCCAAGATCAAGTCC     | AGCTGGGTCCCTGAACACATCCTTG     |
| $\beta$ -actin | AACCGTGAAAAGATGACCCAGAT       | CACAGCCTGGATGGCTACGTA         |
| TAF7           | AGTCTGGGCATGTCAACCTGAA        | CGTAACACAAGGCAAATCGACCA       |

**Supplementary Table S1. qPCR gene primer sequences.** All gene expression analysis was performed using three housekeeping genes (Rpl27,  $\beta$ -actin and TAF7). Abbreviations: ALT: alanine aminotransferase; AST: aspartate aminotransferase; apoH: apolipoprotein H; GC: group specific component; Rpl27: 60s ribosomal protein ligand 27; TAF7: TATA-box-binding protein.

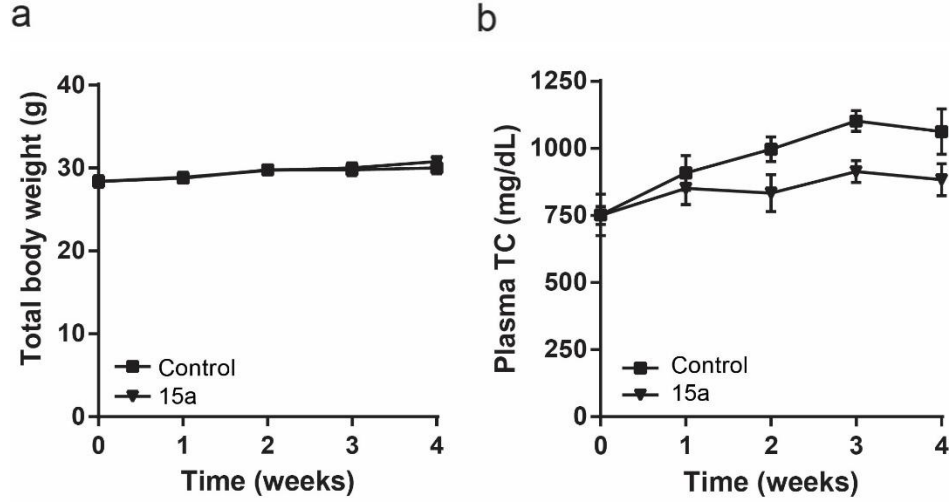

**Supplementary Figure S1. Effect of 15a on body weight and cholesterol levels.** Total body weight (a) and plasma total cholesterol (TC) levels (b) were not significantly affected by treatment with 15a. Graphs shown are representative from one experiment with n=10 controls versus n=9 15a-treated mice.

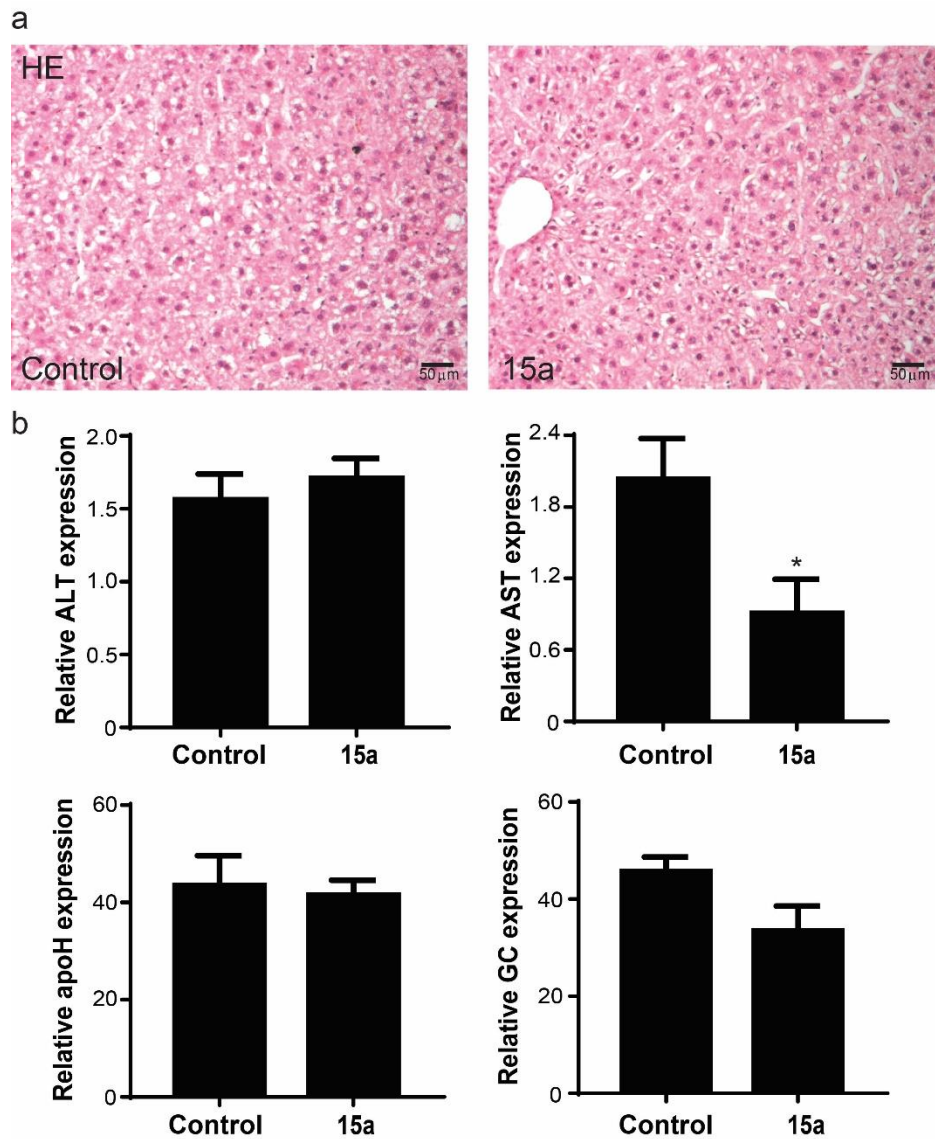

**Supplementary Figure S2. 15a does not affect liver function.** (a) Histological analysis of the liver did not reveal any adverse effects of the 15a treatment as shown by an HE staining. (b) Also, gene expression analysis did not show any differences in mRNA expression of liver toxicity markers ALT, apoH and GC, while liver AST expression levels were even somewhat decreased (\*P=0.02). Graphs shown are representative from one experiment with n=6 per group.

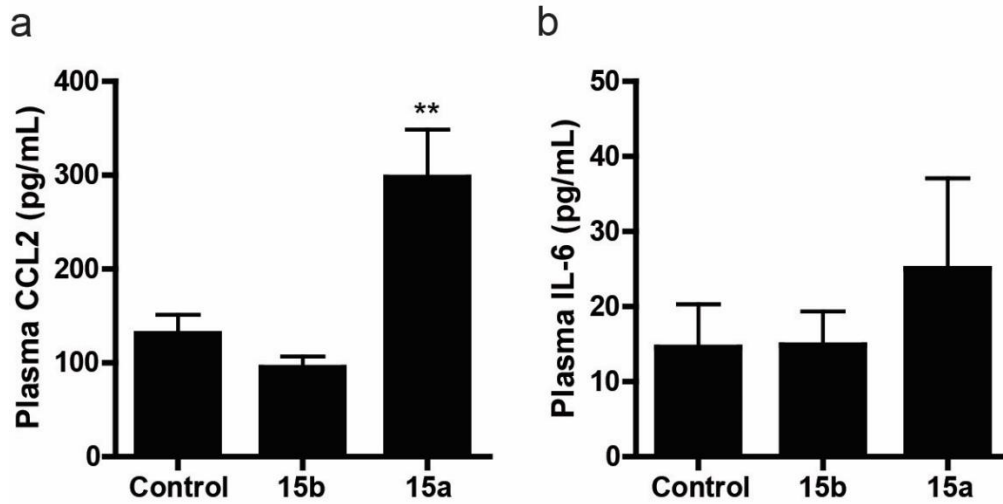

**Supplementary Figure S3. Effect of 15a on CCL2 and IL-6 plasma levels.** Plasma CCL2 levels were increased upon treatment with 15a (a), while IL-6 levels remained unaffected by treatment with 15a (b). \*\* $P < 0.01$ . Graphs shown are representative from one experiment with  $n=10$  controls versus  $n=9$  15a-treated mice.

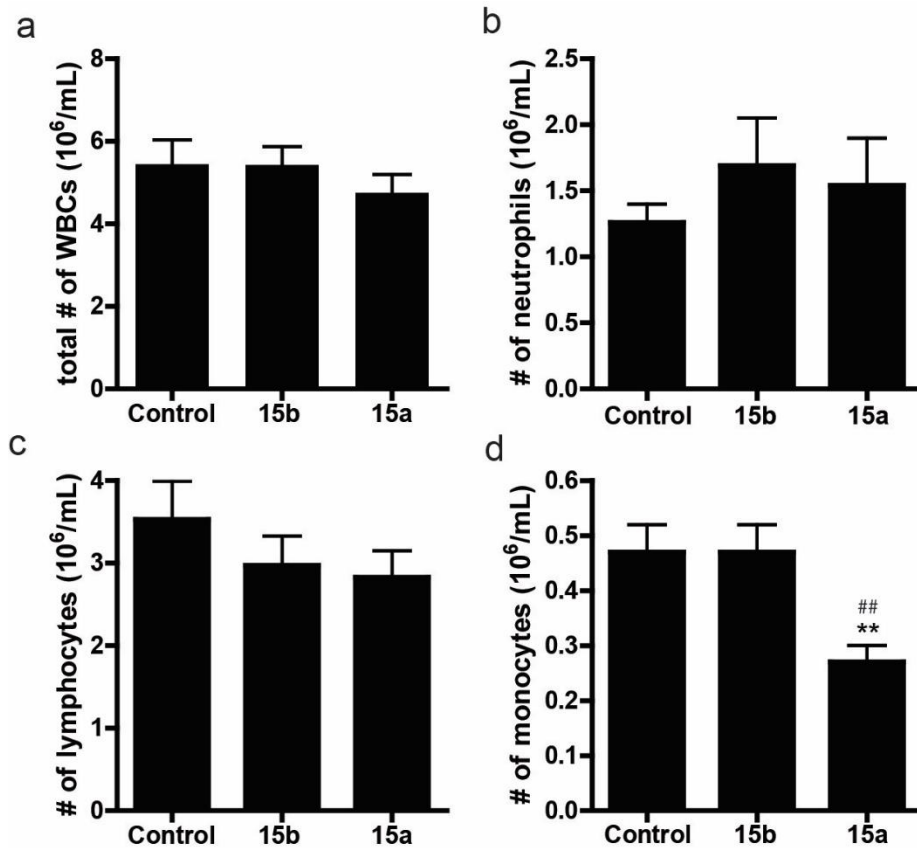

**Supplementary Figure S4. Effect of 15a on white blood cells.** No differences were found in circulating total white blood cell (WBCs) (a), neutrophil (b) or lymphocyte (c) counts between the groups, but 15a significantly reduced the number of circulating monocytes (d). \*\* $P < 0.01$ . Graphs shown are representative from one experiment with  $n=10$  controls versus  $n=9$  15a-treated mice.

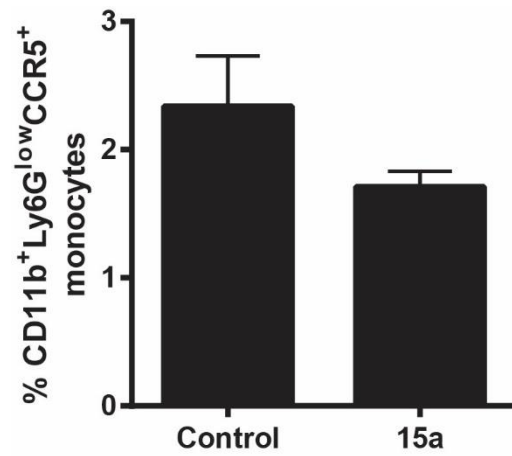

**Supplementary Figure S5. Effect of 15a on CCR5<sup>+</sup> monocytes.** Treatment with 15a did not affect the circulating % of CD11b<sup>+</sup>Ly6G<sup>low</sup>CCR5<sup>+</sup> monocytes. Graphs shown are representative from one experiment with n=6 per group.
